# Supplementary material for: Unveiling the Potential of Algal Extracts as Promising Antibacterial and Antibiofilm Agents against Multidrug-Resistant Pseudomonas aeruginosa: In Vitro and In Silico Studies including Molecular Docking
Source: MDPI journal article supplement (doi:10.3390/plants12183324), 2023-09-20
Supplement: s1 [file s1]

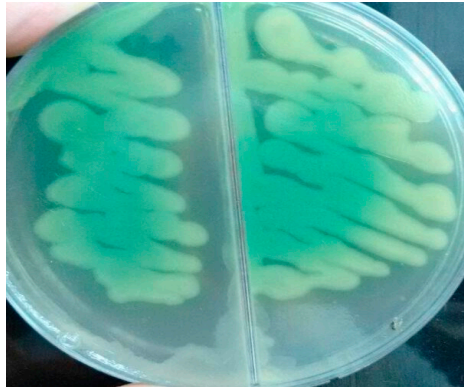

Pyocyanin pigment on cetrinide agar medium

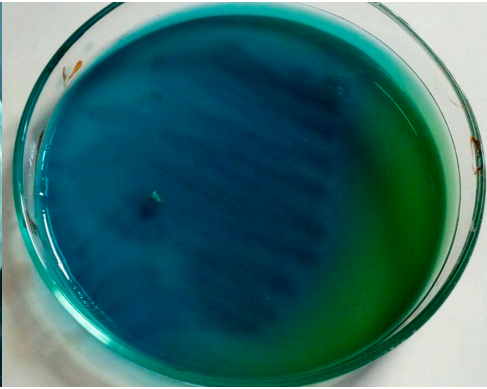

Positive citrate test

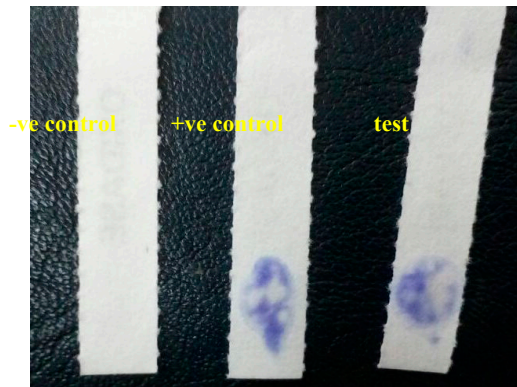

Positive oxidase test

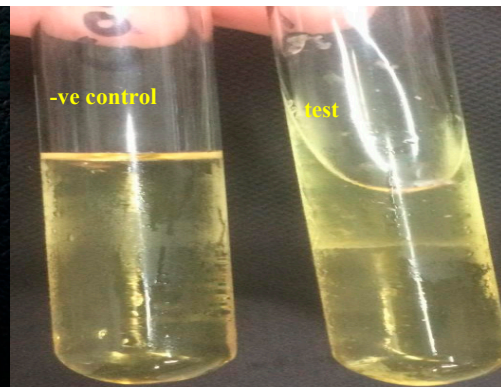

Positive gelatinase test

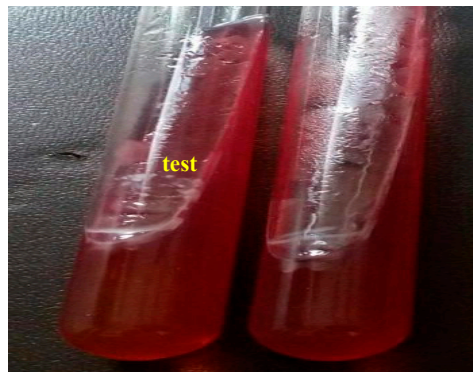

Triple sugar iron agar test tube (-ve)

Figure S1: Some morphological and biochemical characters of the isolated *P. aeruginosa*

**Table S1.** Physicochemical properties, water solubility and pharmacokinetic properties of *A. platensis*acetone extract by *Swiss ADME*.

| Dominate compounds                | Linoleic acid ethyl ester | 3,7,11,15-tetramethyl-2-hexadecen-1-ol | <i>n</i> -hexadecanoic acid | 11,14-eicosadienoic acid, methyl ester | Trans-13-octadecenoic acid |
|-----------------------------------|---------------------------|----------------------------------------|-----------------------------|----------------------------------------|----------------------------|
| <b>Physicochemical Properties</b> |                           |                                        |                             |                                        |                            |
| MW                                | 312.44                    | 256.42                                 | 338.61                      | 366.53                                 | 296.49                     |
| #Heavy atoms                      | 22                        | 18                                     | 24                          | 26                                     | 21                         |
| #H-bond acceptors                 | 4                         | 2                                      | 1                           | 4                                      | 2                          |
| #H-bond donors                    | 0                         | 1                                      | 1                           | 0                                      | 1                          |
| MlogP                             | 3.55                      | 4.19                                   | 5.91                        | 4.36                                   | 4.8                        |
| MR                                | 90.74                     | 80.8                                   | 112.84                      | 109.49                                 | 94.74                      |
| <b>Solubility</b>                 |                           |                                        |                             |                                        |                            |
| Esol log s                        | -3.69                     | -5.98                                  | -5.02                       | -5.69                                  | -5.41                      |
| Esol class                        | Soluble                   | Moderately soluble                     | Moderately soluble          | Moderately soluble                     | Moderately soluble         |
| Silicos-it logsw                  | -4.96                     | -5.51                                  | -5.31                       | -6.17                                  | -5.39                      |
| Silicos-it class                  | Moderately soluble        | Moderately soluble                     | Moderately soluble          | Poorly soluble                         | Moderately soluble         |
| <b>Pharmaco-kinetics</b>          |                           |                                        |                             |                                        |                            |
| Cyp1a2 inhibitor                  | No                        | No                                     | Yes                         | Yes                                    | Yes                        |
| Cyp2c19 inhibitor                 | No                        | No                                     | No                          | No                                     | No                         |
| Cyp2c9 inhibitor                  | No                        | Yes                                    | Yes                         | Yes                                    | Yes                        |
| Cyp2d6 inhibitor                  | No                        | No                                     | No                          | No                                     | No                         |
| Cyp3a4 inhibitor                  | Yes                       | No                                     | No                          | No                                     | No                         |
| Log kp (cm/s)                     | -4.85                     | -2.29                                  | -2.77                       | -2.66                                  | -2.6                       |
| <b>Likeness drug</b>              |                           |                                        |                             |                                        |                            |
| Lipinski #violations              | 0                         | 1                                      | 1                           | 1                                      | 1                          |
| Bioavailability score             | 0.55                      | 0.55                                   | 0.85                        | 0.55                                   | 0.85                       |
| PAINS #alerts                     | 0                         | 0                                      | 0                           | 0                                      | 0                          |
| Synthetic accessibility           | 3.11                      | 4.3                                    | 2.31                        | 3.41                                   | 3.07                       |
| <b>Toxicity</b>                   |                           |                                        |                             |                                        |                            |
| Hepatotoxicity                    | inactive                  | inactive                               | inactive                    | inactive                               | inactive                   |
| cytotoxicity                      | inactive                  | inactive                               | inactive                    | inactive                               | inactive                   |

**Table S2.** Physicochemical properties, water solubility and pharmacokinetic properties of *P. scopulorum* methanol extract by *Swiss ADME*.

| Dominate compounds                | Linolenic acid methyl ester | n-hexadecanoic acid methyl ester | 3-bromo-4,5-dihydroxybenzaldehyde | Bis (3-bromo-4,5-dihydroxybenzyl) ether | 3,4-dihydroxybenzaldehyde |
|-----------------------------------|-----------------------------|----------------------------------|-----------------------------------|-----------------------------------------|---------------------------|
| <b>Physicochemical Properties</b> |                             |                                  |                                   |                                         |                           |
| MW                                | 278.43                      | 240.38                           | 217.02                            | 420.05                                  | 138.12                    |
| #Heavy atoms                      | 20                          | 17                               | 11                                | 21                                      | 10                        |
| #H-bond acceptors                 | 0                           | 0                                | 3                                 | 5                                       | 3                         |
| #H-bond donors                    | 1                           | 0                                | 2                                 | 4                                       | 2                         |
| MlogP                             | 4.38                        | 3.84                             | 0.94                              | 2.21                                    | 0.18                      |
| MR                                | 88.99                       | 75.03                            | 43.58                             | 85.28                                   | 35.88                     |
| <b>Solubility</b>                 |                             |                                  |                                   |                                         |                           |
| Esol log s                        | -4.78                       | -3.86                            | -2.83                             | -4.51                                   | -1.76                     |
| Esol class                        | Moderately soluble          | Soluble                          | Soluble                           | Moderately soluble                      | Very soluble              |
| Silicos-it logsw                  | -3.96                       | -4.49                            | -3.46                             | -4.77                                   | -1.17                     |
| Silicos-it class                  | Soluble                     | Moderately soluble               | Soluble                           | Moderately soluble                      | Soluble                   |
| <b>Pharmaco-kinetics</b>          |                             |                                  |                                   |                                         |                           |
| Cyp1a2 inhibitor                  | Yes                         | Yes                              | Yes                               | Yes                                     | No                        |
| Cyp2c19 inhibitor                 | No                          | No                               | Yes                               | No                                      | No                        |
| Cyp2c9 inhibitor                  | No                          | No                               | Yes                               | Yes                                     | Yes                       |
| Cyp2d6 inhibitor                  | No                          | No                               | Yes                               | Yes                                     | No                        |
| Cyp3a4 inhibitor                  | No                          | No                               | Yes                               | Yes                                     | No                        |
| Log kp (cm/s)                     | -4.02                       | -6.3                             | -6.66                             | -6.71                                   | -3.04                     |
| <b>Likeness drug</b>              |                             |                                  |                                   |                                         |                           |
| Lipinski #violations              | 1                           | 0                                | 0                                 | 0                                       | 0                         |
| Bioavailability score             | 0.85                        | 0.55                             | 0.55                              | 0.55                                    | 0.55                      |
| PAINS #alerts                     | 0                           | 0                                | 1                                 | 0                                       | 1                         |
| Synthetic accessibility           | 3.03                        | 2.71                             | 1.49                              | 2.30                                    | 1                         |
| <b>Toxicity</b>                   |                             |                                  |                                   |                                         |                           |
| Hepatotoxicity                    | inactive                    | inactive                         | Inactive                          | inactive                                | inactive                  |
| cytotoxicity                      | inactive                    | inactive                         | inactive                          | inactive                                | inactive                  |

Table S3: Molecular docking data presents results from docking simulations of various phytycocompounds from PME and AAE

| Extract | phytycocompounds                        | Est. Free Energy of Binding (kcal/mol) | Est. Inhibition Constant, Ki (mM) | vdW + Hbond + desolv Energy (kcal/mol) | Electrostatic Energy (kcal/mol) | Total Inter-molecular Energy (kcal/mol) |
|---------|-----------------------------------------|----------------------------------------|-----------------------------------|----------------------------------------|---------------------------------|-----------------------------------------|
| PME     | Linolenic acid methyl ester             | -2.11                                  | 28.56                             | -5.02                                  | +0.14                           | -4.88                                   |
|         | 3-Bromo-4,5-dihydroxybenzaldehyde       | -4.54                                  | 0.47                              | -3.65                                  | -0.41                           | -4.06                                   |
|         | Bis (3-bromo-4,5-dihydroxybenzyl) ether | -4.59                                  | 0.43                              | -4.46                                  | -0.35                           | -4.80                                   |
|         | 3,4-dihydroxybenzaldehyde               | -3.72                                  | 1.89                              | -3.91                                  | -0.10                           | -4.01                                   |
|         | n-Hexadecanoic acid methyl ester        | -1.31                                  | 110.00                            | -5.32                                  | -0.03                           | -5.34                                   |
| AAE     | Linolenic acid ethyl ester              | -1.59                                  | 68.60                             | -5.19                                  | -0.07                           | -5.26                                   |
|         | 11,14-Eicosadienoic acid, methyl ester  | -2.50                                  | 14.71                             | -6.57                                  | -0.05                           | -6.63                                   |
|         | trans-13-Octadecenoic acid              | -2.59                                  | 12.55                             | -5.23                                  | -0.93                           | -6.15                                   |
|         | 3,7,11,15-Tetramethyl-2-hexadecen-1-ol  | -2.75                                  | 9.66                              | -5.90                                  | -0.04                           | -5.93                                   |
|         | n-Hexadecanoic acid                     | -1.96                                  | 36.36                             | -6.09                                  | +0.38                           | -5.71                                   |

**Table S4. Primer sequences used in this study.**

| Genes                      | Sequences                                           |
|----------------------------|-----------------------------------------------------|
| <i>algD</i>                | F-CTACATCGAGACCGTCTGCC<br>R-GCATCAACGAACCGAGCATC    |
| <i>pelF</i>                | F-GAGGTCAGCTACATCCGTCG<br>R-TCATGCAATCTCCGTGGCTT    |
| <i>psiD</i>                | F- TGTACACCGTGCTCAACGAC<br>R- CTTCCGGCCCCGATCTTCATC |
| Reference gene<br>16S rRNA | GCTGCCCTTTGTATTGTC<br>AGATGTTGGGTTAAGTCCC           |
